# Supplementary material for: Health Information Obtained From the Internet and Changes in Medical Decision Making: Questionnaire Development and Cross-Sectional Survey
Source: PubMed Central journal article supplement (PMC5826978; doi:10.2196/jmir.9370), 2018-02-12
Supplement: jmir_v20i2e47_app2.pdf [file jmir_v20i2e47_app2.pdf]

**Appendix 2. The Online Health Information Utilization questionnaire (OHIU).**

|             |    | <b>Items</b>                                                                                                                                            |
|-------------|----|---------------------------------------------------------------------------------------------------------------------------------------------------------|
| <b>CD 1</b> | 1  | After searching for online health information, I will change my views to align with the information I obtained.                                         |
| <b>CD 2</b> | 2  | After searching for online health information, I will change my decision, aligning with the information I obtained, about whether to see a doctor.      |
| <b>CD 3</b> | 3  | After searching for online health information, I will change my judgments, aligning with the information I obtained, on personal medical issues.        |
| <b>CD 4</b> | 4  | After searching for online health information, I will change my decision, aligning with the information I obtained, about whether to consult an expert. |
| <b>CO 1</b> | 5  | Online health information is an important reference for me when making medical decisions.                                                               |
| <b>CO 2</b> | 6  | I will discuss relevant issues with a doctor based on the health information on the Internet.                                                           |
| <b>CO 3</b> | 7  | I will discuss relevant issues with my family or friends based on the health information on the Internet.                                               |
| <b>CO 4</b> | 8  | I will discuss relevant issues with experts based on the health information on the Internet.                                                            |
| <b>PS 1</b> | 9  | I am confident that I can evaluate the accuracy of online health information for making medical decisions.                                              |
| <b>PS 2</b> | 10 | I am confident that I can make good use of online medical information.                                                                                  |
| <b>PS 3</b> | 11 | I am confident that I can find useful online health information.                                                                                        |
| <b>PS 4</b> | 12 | I am confident that I can make correct medical judgments on personal medical issues based on online medical information.                                |

Abbreviation List: CD = changing decisions; CO = consulting others; PS = promoting self-efficacy.
